# Supplementary material for: Initial Experience of Articulating Laparoscopic Instruments for Benign Gynecologic Disease: A Single-Arm Multicenter Prospective Study (Korean Gynecologic Oncology Group 4002)
Source: MDPI journal article supplement (doi:10.3390/jpm13101433), 2023-09-25
Supplement: s1 [file s1]

Supplementary files link:

<https://drive.google.com/file/d/1qTqQ65ul8T3zeCTIVAT6Fuv-V-uC8Kdj/view?usp=sharing>
